# Supplementary material for: Ceiling culture chip reveals dynamic lipid droplet transport during adipocyte dedifferentiation via actin remodeling
Source: Royal Society of Chemistry journal article supplement (doi:10.1039/d2lc00428c), 2022-01-01
Supplement: d2lc00428c1.pdf [file d2lc00428c1.pdf]

Supplementary Information

**Ceiling culture chip reveals dynamic lipid droplet transport during adipocyte dedifferentiation via actin remodeling**

**Authors**

Jiwon Kim,<sup>a†</sup> Kun-Young Park,<sup>b†</sup> Sungwoo Choi,<sup>b</sup> Ung Hyun Ko,<sup>a</sup> Dae-Sik Lim,<sup>cd</sup> Jae Myoung Suh,<sup>b</sup> and Jennifer H. Shin<sup>a</sup>

<sup>a</sup> Department of Mechanical Engineering, Korea Advanced Institute of Science and Technology, Daejeon, Republic of Korea

<sup>b</sup> Graduate School of Medical Science and Engineering, Korea Advanced Institute of Science and Technology, Daejeon, Republic of Korea

<sup>c</sup> National Creative Research Center for Cell Plasticity, Korea Advanced Institute of Science and Technology, Daejeon, Republic of Korea

<sup>d</sup> Department of Biological Sciences, Korea Advanced Institute of Science and Technology, Daejeon, Republic of Korea

† These authors contributed equally to this work.

**Contents**

Supplementary Figure 1

Supplementary Figure 2

Supplementary Figure 3

Supplementary Figure 4

Supplementary Figure 5

Supplementary Figure 6

Captions for Supplementary Video 1-7

## Supplementary Figure 1

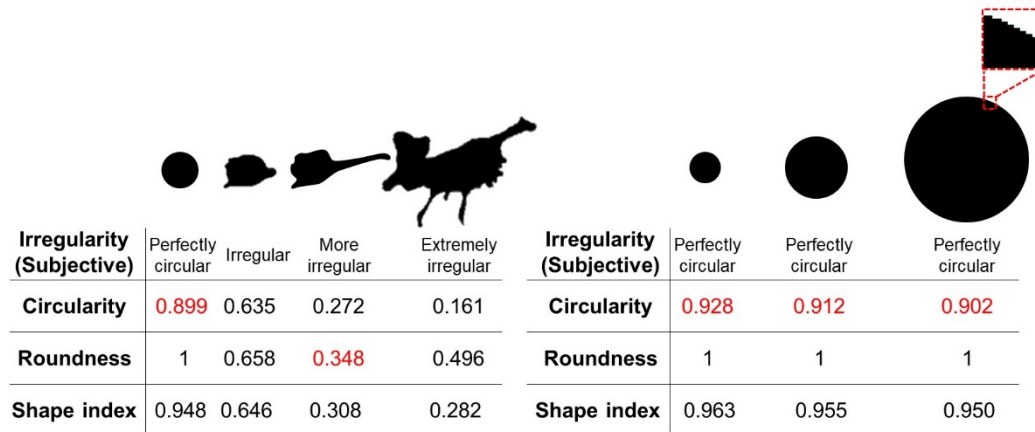

Supplementary Fig. 1. Comparison of various indices for morphological quantification.

## Supplementary Figure 2

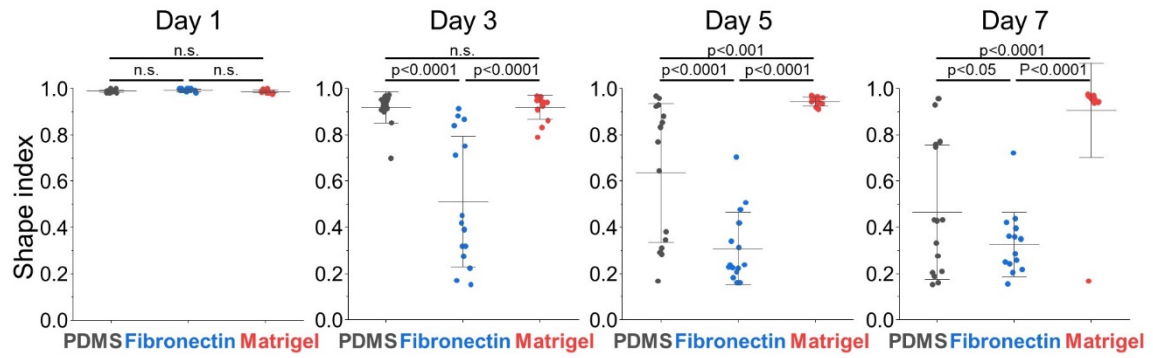

**Supplementary Fig. 2. Shape index distributions of vWAT adipocytes over time.** I-shaped bars represent mean  $\pm$  s.d. n=15 each. p-value from one-way ANOVA with Fisher's LSD *post hoc* test. t-value from two-tailed t-test v.s. Day n-2 data of the same group.

## Supplementary Figure 3

### (1) Secretion involving mechanical vibration

The lipid droplet vibrates vigorously before the secretion.

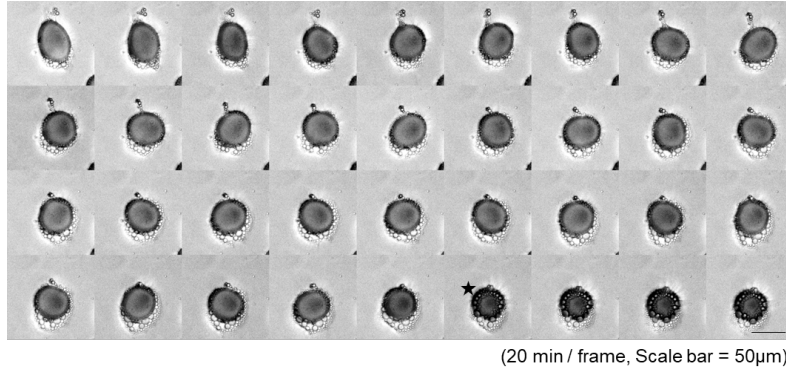

Supplementary Fig. 3.a. Mechanical vibration involved secretion, case 1 (Cell featured Fig.4)

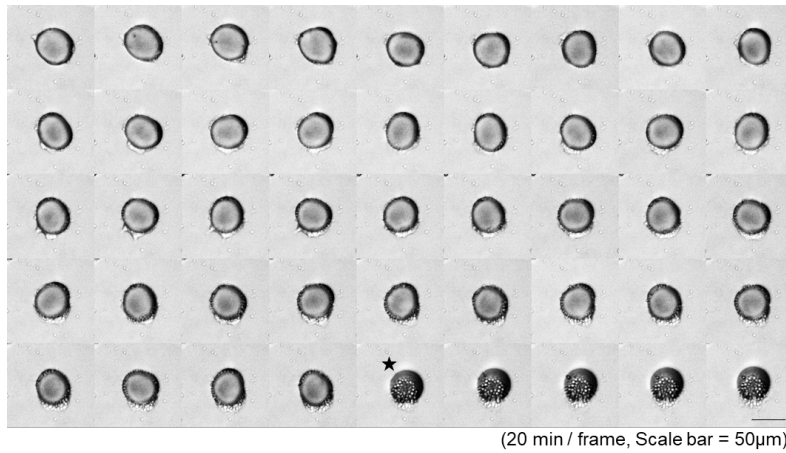

Supplementary Fig. 3.b. Mechanical vibration involved secretion, case 2

### (2) Secretion involving crescent-shaped band structure

A rope-like structure, shown as a crescent-shaped band, appears and squeezes the LD to suddenly extrude it from the cell (Supplementary Video 3). Band structure is indicated by solid arrowheads.

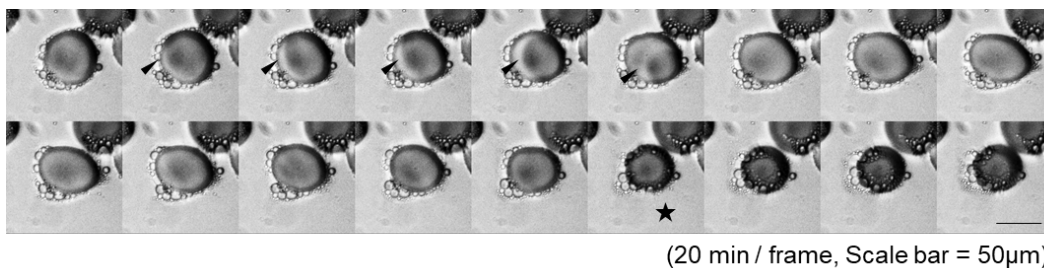

Supplementary Fig. 3.c. Crescent-shaped band structure involved secretion, case 1  
(Cell featured Supplementary Video 3)

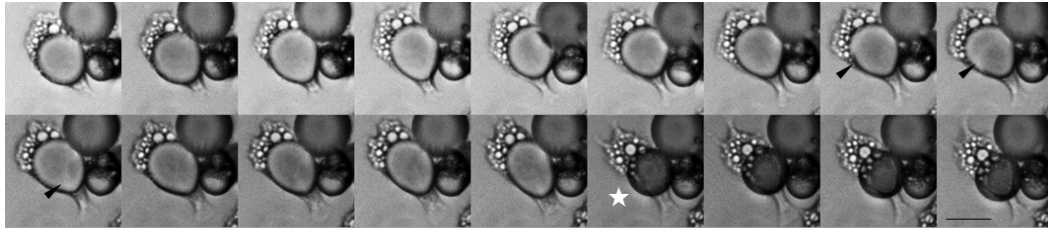

(20 min / frame, Scale bar = 50 $\mu$ m)

**Supplementary Fig. 3.a.d.** Crescent-shaped band structure involved secretion, case 2

### (3) Secretion involving sudden cellular elongation

Lipid droplets get extruded soon after the sudden elongation of the cell.

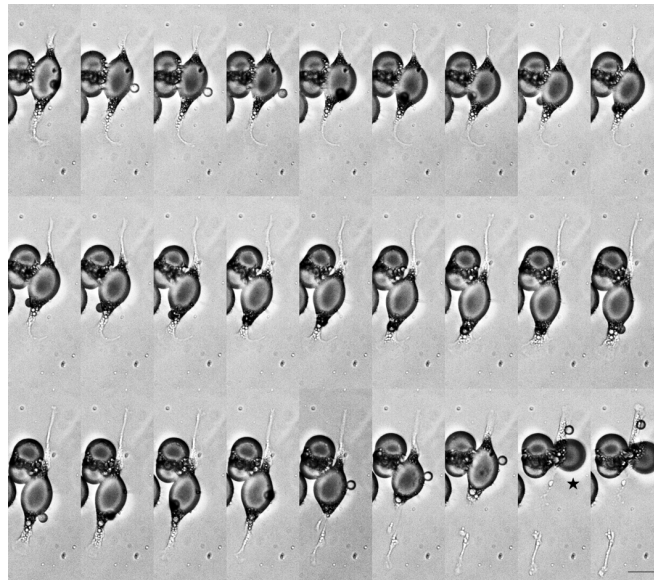

(20 min / frame, Scale bar = 50 $\mu$ m)

**Supplementary Fig. 3.e.** Elongation-driven secretion, case 1

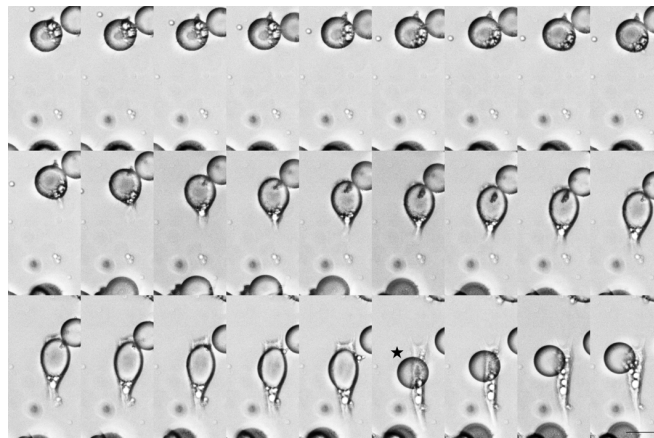

(20 min / frame, Scale bar = 50 $\mu$ m)

**Supplementary Fig. 3.f.** Elongation-driven secretion, case 2

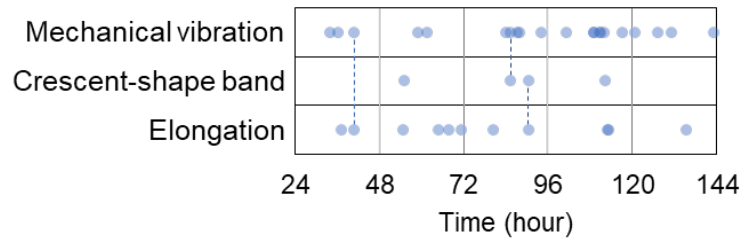

**Supplementary Fig. 3.g.** Timepoints of liposecretion events  
 (Two points connected with the dotted line indicate a single event)

## Supplementary Figure 4

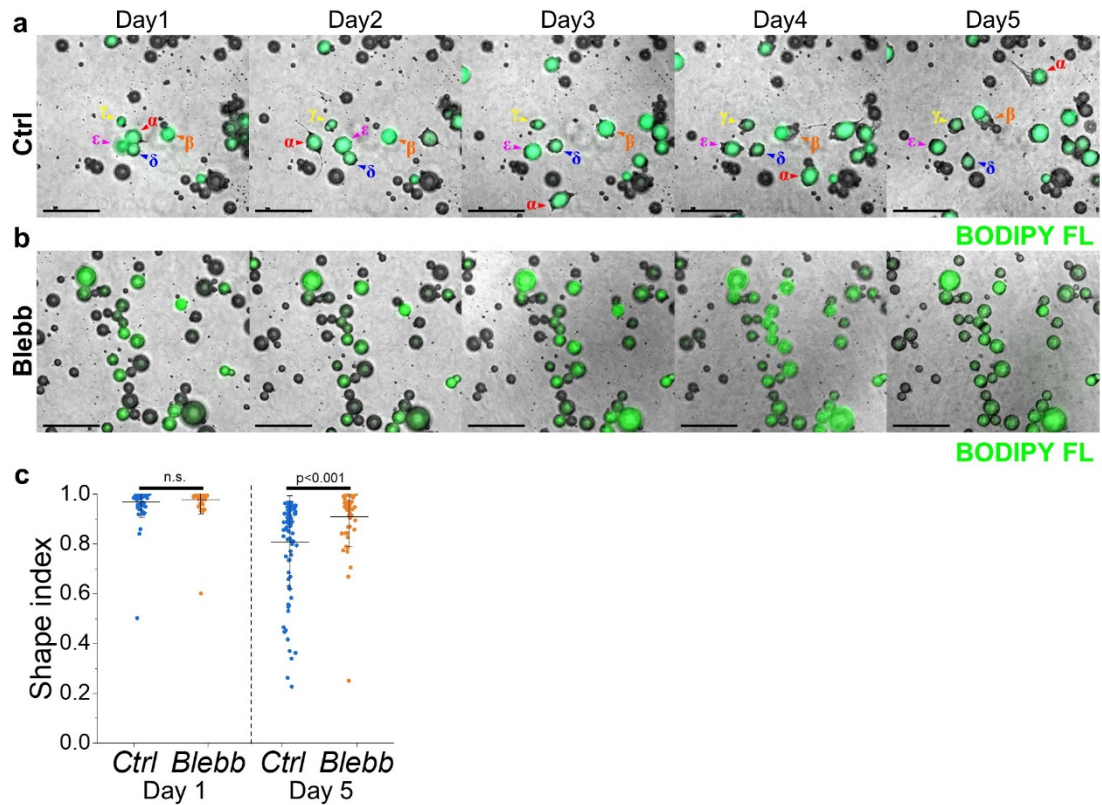

**Supplementary Fig. 4. Blebbistatin suppresses LD secretion.** **a** Representative image of dedifferentiation of the control group. Cells undergoing dedifferentiation moved around dynamically (scale bar = 200 $\mu$ m). **b** Representative images of 50 $\mu$ M blebbistatin treatment group. Cells are in a motionless state compared to the control group (scale bar = 200 $\mu$ m). **c** Shape indices of control group and blebbistatin treatment group. On day 5, the shape indices of the blebbistatin treatment group are significantly higher than those of the control group. t-value from two-tailed t-test. n=76, 50, 87, and 54 for Ctrl Day 1, Blebb Day 1, Ctrl Day 5, and Blebb Day 5 respectively.

## Supplementary Figure 5

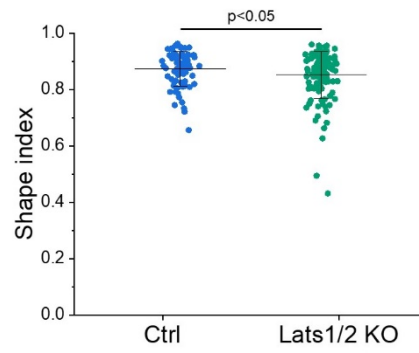

**Supplementary Fig. 5. Shape index distributions of control mT/mG mice adipocytes and *Lats1/2* iAKO mice adipocytes at Day 5.** t-value from two-tailed t-test. n=82 and 124 for Ctrl and *Lats1/2* KO respectively.



## Supplementary Figure 6

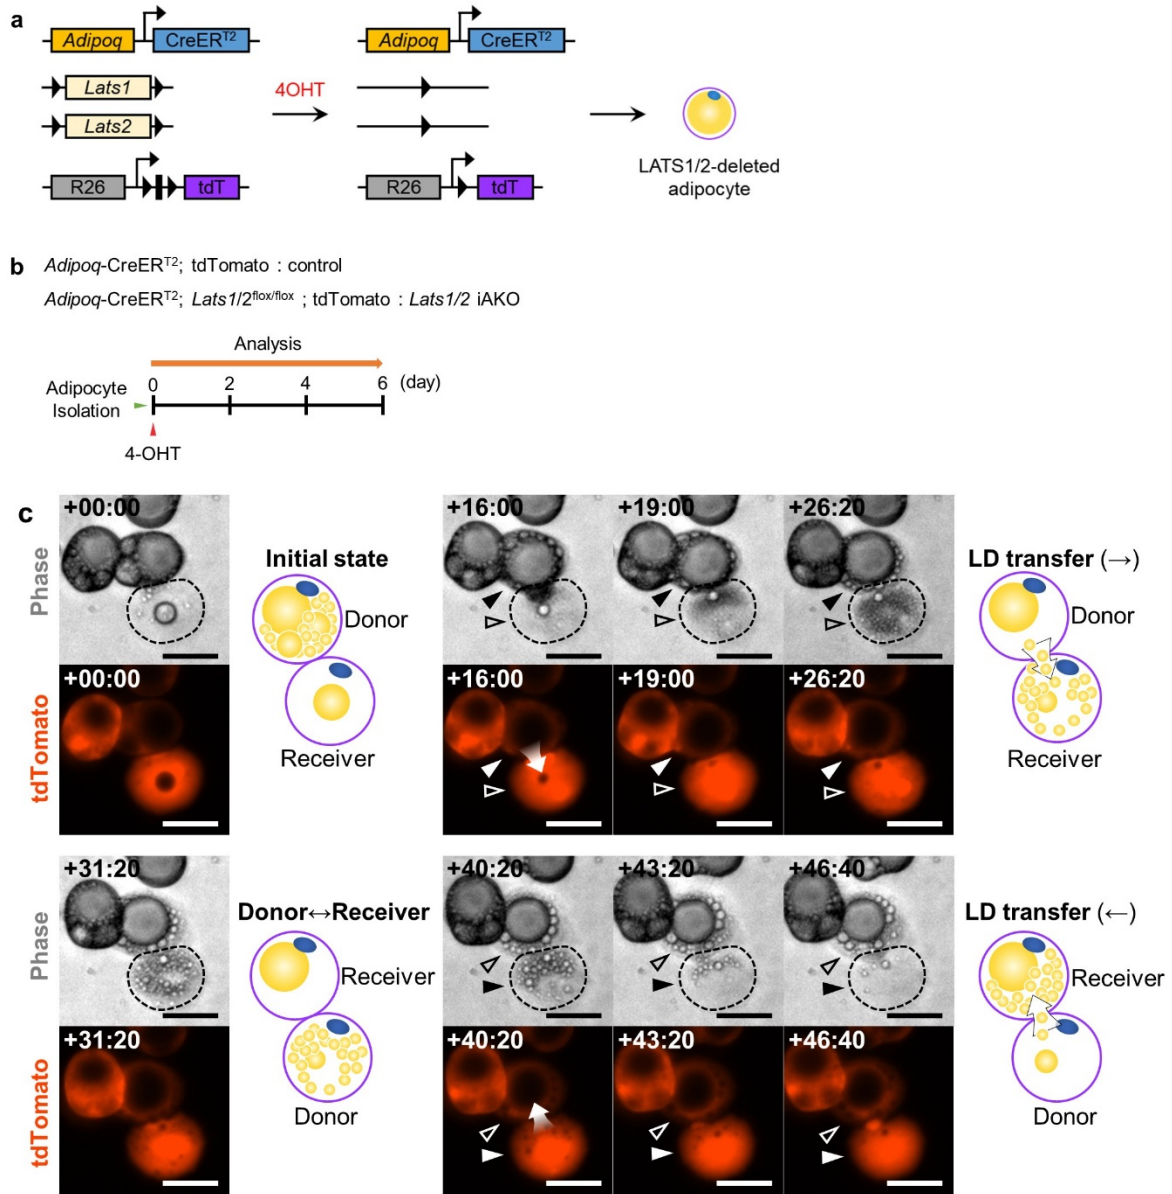

**Supplementary Fig. 6. Adipocyte-specific suppression of the Hippo pathway induces a unique mode of LD secretion into adjacent adipocytes.** **a** Schematic diagram for 4-hydroxytamoxifen (4OHT)-inducible *Lats1/2* knockout and labeling primary adipocytes from *Lats1/2* iAKO (*Adipoq*-CreER<sup>T2</sup>; *Lats1/2*<sup>fllox/fllox</sup>; tdTomato) mice. **b** Experimental scheme for adipocyte isolation and deletion of LATS1/2 in adipocytes from control (*Adipoq*-CreER<sup>T2</sup>; tdTomato) or *Lats1/2* iAKO mice and their analysis for 6 days. **c** Time-lapse imaging of intercellular lipid exchange between adipocytes isolated from *Lats1/2* iAKO mice. Relative time from 4d:18h:45m. Scale bar, 50 $\mu$ m.

### **Supplementary Video 1**

Adipocyte undergoing dedifferentiation is making pseudopod structures towards the moving direction.

### **Supplementary Video 2**

Abrupt distortion of cellular morphology before the whole lipid droplet secretion.

### **Supplementary Video 3**

Ring-like structure is observed to sweeping the lipid droplet.

### **Supplementary Video 4**

Dedifferentiated cell which is still expressing the GFP signal is dividing into two daughter cells.

### **Supplementary Video 5**

Lipid contents of cells are being transferred to neighboring cell. Meanwhile, the sizes of donor cells are decreasing.

### **Supplementary Video 6**

Lipid content of WT BODIPY<sup>+</sup> cell is being transferred to neighboring mTmG cell. Meanwhile, the sizes of donor cells are decreasing. Relative time from 1d:4h:30m

### **Supplementary Video 7**

Adipocyte-specific activation of YAP/TAZ induces a unique mode of liposecretion into adjacent adipocytes. A Schematic diagram for 4-hydroxytamoxifen (4OHT)-inducible LATS1/2 knockout and labeling of primary adipocytes from *Lats1/2* iAKO (*Adipoq*-CreER<sup>T2</sup>; *Lats1/2*<sup>flox/flox</sup>; tdTomato) mice. Relative time from 4d:18h:45m.
